# Supplementary material for: Development and Implementation of Workshops to Optimize the Delivery of Vaccination Services in Community Pharmacies: Thinking beyond COVID-19
Source: MDPI journal article supplement (doi:10.3390/pharmacy11040129), 2023-08-13
Supplement: s1 [file s1]

**Supplementary Files To:**

**Development and implementation of workshops to  
optimize the delivery of vaccination services in  
community pharmacies: Thinking beyond COVID-19**

**Corresponding Author:**

Arnaud Lavenue, PharmD, MSc

Toc Toc Communications, 104-7030 Rue Marconi, Montréal, Québec, Canada H2S 3K1

Email: [alavenue@toctoccommunications.com](mailto:alavenue@toctoccommunications.com)

Tel: +1 (514) 813-0769

Fax: +1 (514) 868-0815

August 13, 2023

## Supplementary File 1:

### Workshop Evaluation Questionnaire

1- Very low (VL)   2- Low (L)   3- Medium (M)   4- High (H)   5- Very high (VH)

| Questions                                                                                                                     | 1<br>VL | 2<br>L | 3<br>M | 4<br>H | 5<br>VH | N/A |
|-------------------------------------------------------------------------------------------------------------------------------|---------|--------|--------|--------|---------|-----|
| 1. This activity will have a direct impact on my practice.                                                                    |         |        |        |        |         |     |
| 2. The workshop allowed me to reach my main goal of developing a personalized action plan to optimize my vaccination service. |         |        |        |        |         |     |
| 3. will be recommending this activity to other pharmacist-owners.                                                             |         |        |        |        |         |     |
| 4. The content was organized in a coherent and consistent way.                                                                |         |        |        |        |         |     |
| 5. The workshop facilitator interacted with participants.                                                                     |         |        |        |        |         |     |
| 6. The discussions I had with colleagues were relevant.                                                                       |         |        |        |        |         |     |

**Supplementary File 2:**  
**Results from Workshop Evaluation Questionnaire**

| Question | Responses |     |        |      |           |       |
|----------|-----------|-----|--------|------|-----------|-------|
|          | Very Low  | Low | Medium | High | Very High | Total |
| Q1       | 0         | 1   | 3      | 13   | 16        | 33    |
| Q2       | 0         | 0   | 4      | 13   | 16        | 33    |
| Q3       | 0         | 2   | 1      | 13   | 17        | 33    |
| Q4       | 0         | 1   | 1      | 20   | 11        | 33    |
| Q5       | 0         | 0   | 0      | 6    | 27        | 33    |
| Q6       | 0         | 0   | 2      | 12   | 19        | 33    |
